# Supplementary material
Source: PubMed Central journal article supplement (PMC3334456)
Supplement: NIHMS344069-supplement-01.pdf [file NIHMS344069-supplement-01.pdf]

Supplemental Table 1. Correlations with additional cognitive measures; partial correlations controlling for age are shown in parentheses.

|                          | Animal naming      | Trailmaking A       | TrailmakingB |
|--------------------------|--------------------|---------------------|--------------|
| Age                      | <b>-.43</b>        | <b>-.35</b>         | <b>-.35</b>  |
| PIB                      | <b>-.18</b> (-.08) | .08(.01)            | -.10(-.06)   |
| A $\beta$ <sub>42</sub>  | .07 (-.02)         | $\alpha$ .03 (-.07) | .13 (.09)    |
| Tau                      | <b>-.17</b> (-.07) | -.11 (.00)          | -.06 (.06)   |
| Ptau                     | <b>-.19</b> (-.07) | <b>-.15</b> (-.10)  | -.06 (.03)   |
| <i>APOE</i> $\epsilon$ 4 | .05 (.05)          | <b>.15</b> (.14)    | .06 (.03)    |
| <i>APOE</i> $\epsilon$ 2 | -.07 (-.08)        | -.02 (.00)          | -.07 (-.05)  |

Note: Correlations in bold are significant at  $p < .05$ .

Supplemental Table 2. Partial correlations with volume in additional brain regions  
controlling for age

|                     | PIB  | A $\beta$ <sub>42</sub> | Tau  | Ptau | <i>APOE</i> $\epsilon$ 4 | <i>APOE</i> $\epsilon$ 2 |
|---------------------|------|-------------------------|------|------|--------------------------|--------------------------|
| Temporal            | -.07 | .03                     | .01  | .05  | -.01                     | .04                      |
| Lateral parietal    | -.09 | -.01                    | -.02 | -.03 | -.04                     | -.02                     |
| Precuneus           | -.08 | .00                     | -.06 | -.09 | -.05                     | -.02                     |
| Posterior cingulate | -.09 | .03                     | -.16 | .16  | -.06                     | .09                      |
| Anterior cingulate  | -.08 | -.02                    | .06  | .08  | .05                      | -.02                     |
| Entorhinal          | -.13 | .08                     | -.01 | .11  | -.06                     | -.09                     |
| Parahippocampus     | -.16 | .15                     | -.14 | .02  | -.14                     | -.05                     |
